# Supplementary material
Source: PubMed Central journal article supplement (PMC2629334)
Supplement: 0810372105_0810372105SI.pdf [file 0810372105_0810372105SI.pdf]

# Supporting Information

Negishi *et al.* 10.1073/pnas.0810372105

## SI Materials and Methods

**Generation of Transgenic Mice.** Human TLR3 cDNA was cloned into pCAGGS at the XhoI site (1). The DNA fragment containing TLR3 under the control of the  $\beta$ -actin promoter released by digestion with Sall and HindIII was gel-purified and microinjected into the pronucleus of fertilized eggs of C57BL/6 mice.

**RNA Analysis.** RNA extraction and reverse transcription were performed as described (2). Quantitative real-time RT-PCR analysis was performed using a LightCycler and SYBRGreen system (Roche). Data were normalized with the level of GAPDH expression in each sample. Primers for IL12-p35, IL-12p40, IFN- $\beta$ , GAPDH, and Cxcl10 have been described previously (3). The following primers were used for IL-1 $\beta$ :

5'-GCTTCAGGCAGGCAGTATCAC-3' and 5'-CGACAGCACGAGGCTTTTT-3'.

**Histology.** Organs were removed and fixed in 4% paraformaldehyde for 3 days at 4 °C, then embedded in paraffin, sectioned, and stained with H&E or Masson's trichrome. For immunohistochemical staining, tissues were embedded in OCT compound and snap-frozen in liquid nitrogen. Cryostat sections (10  $\mu$ m thick) were fixed with acetone and methanol, and stained with FITC-conjugated anti-CD45 and biotin-conjugated anti-CD11b antibodies (PharMingen), and subsequently with streptavidin-Alexa Fluor 546 (Molecular Probes) and 4-,6-diamidino-2 phenylindole (DAPI) (Nakarai Tesque). For CVB3 staining, anti-CVB3 antibody (Chemicon) and VECTOR M.O.M. Immunodetection kit (Vector Laboratories) were used. Sections were examined using a fluorescence microscope (Olympus).

1. Niwa H, Yamamura K, Miyazaki J (1991) Efficient selection for high-expression transfectants with a novel eukaryotic vector. *Gene* 108:193–199.
2. Honda K, *et al.* (2005) IRF-7 is the master regulator of type-I interferon-dependent immune responses. *Nature* 434:772–777.
3. Negishi H, *et al.* (2006) Evidence for licensing of IFN-gamma-induced IFN regulatory factor 1 transcription factor by MyD88 in Toll-like receptor-dependent gene induction program. *Proc Natl Acad Sci USA* 103:15136–15141.

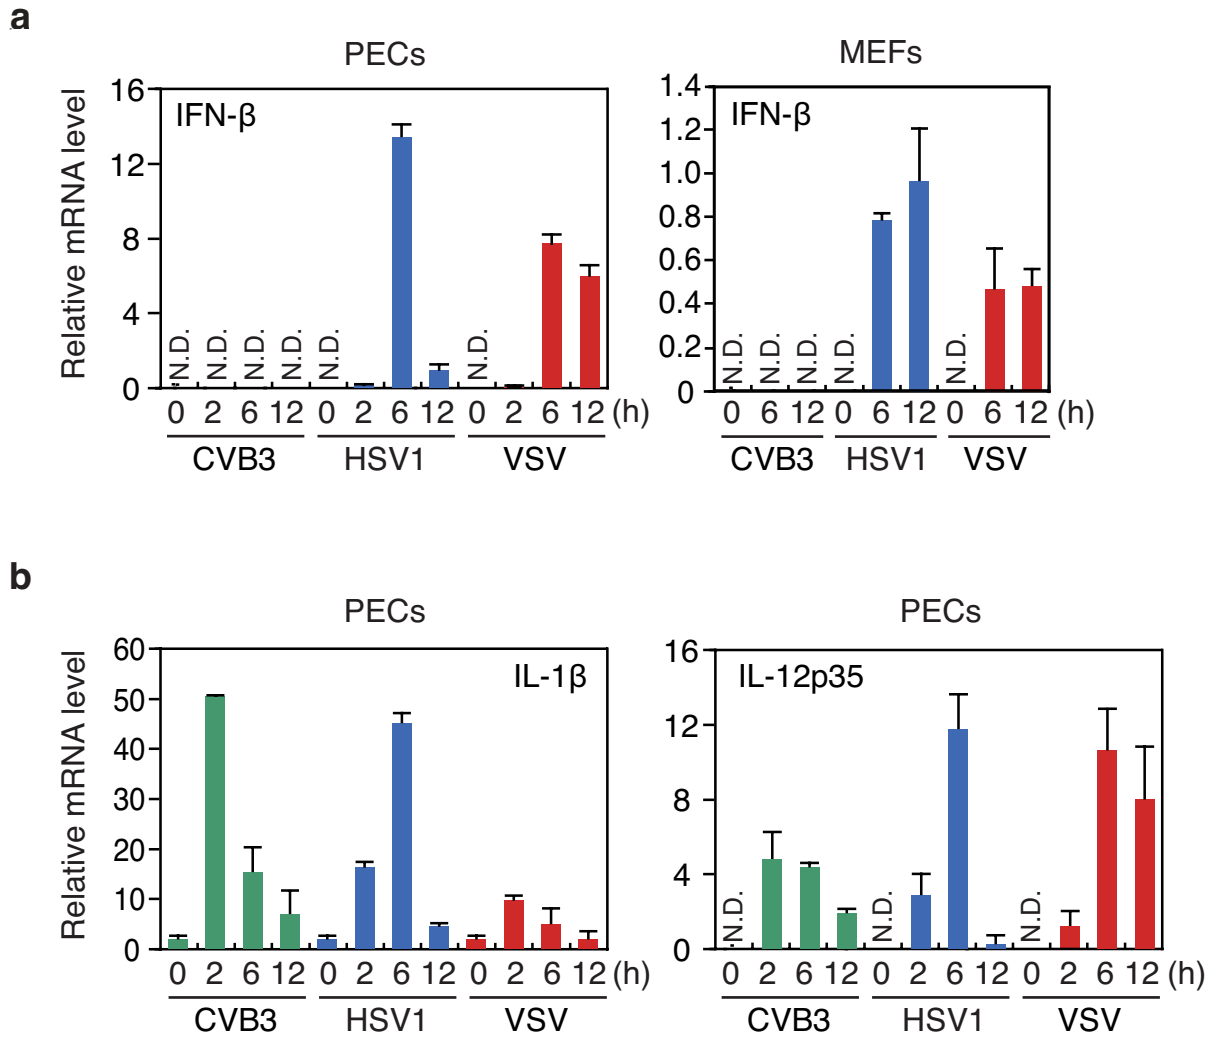

**Fig. S1.** Type I IFN response in cells infected with CVB3, HSV1 or VSV. (a, b) PECs or MEFs were infected with CVB3 (3 moi), HSV1 (1 moi), or VSV (1 moi) for the indicated periods. Total RNA was prepared and the mRNA expression levels of the indicated genes were determined by real-time RT-PCR. Data are presented as mean  $\pm$  SD of triplicate determinations. All experiments were performed more than twice with similar results. ND, not detected.

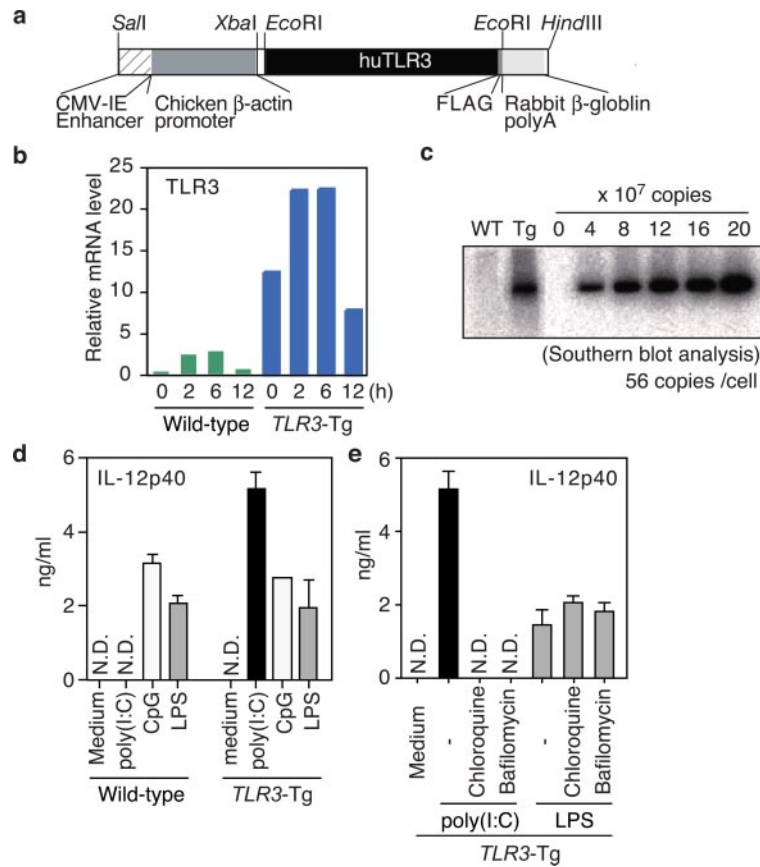

**Fig. S2.** Generation of transgenic mice. (a) Schematic diagram of the DNA fragment containing TLR3 cDNA under the control of the  $\beta$ -actin promoter used for the generation of *TLR3*-Tg mice. (b) PECs were stimulated with IFN- $\beta$  (1000 U/ml) for the indicated periods. Total RNA was prepared and subjected to real-time RT-PCR analysis for TLR3 mRNA expression using primer sets that amplify both human and mouse TLR3 mRNA. The following primers were used: 5'-GATTGGGTCTGGGAACAT-3' and 5'-GCAAACAGAGTGCATGGT-3'. (c) Genomic DNA from the spleen of wild-type (WT) or *TLR3*-Tg (Tg) mice was prepared, digested with SalI and HindIII, and subjected to Southern blot analysis. The transgene copy number (56 copies per cell) was determined by comparing the bands of serially diluted plasmid DNA fragments containing TLR3 cDNA. (d) PECs were stimulated with poly(I:C) (100  $\mu$ g/ml), LPS (100 ng/ml), or CpG-DNA (3  $\mu$ mol/l) for 24 h. The IL-12p40 concentration in the culture supernatant was assessed by ELISA. Data are expressed as mean  $\pm$  SD of triplicate samples. ND, not detected. Note that *TLR3*-Tg cells showed augmented response only to poly(I:C) stimulation. (e) PECs were stimulated with medium alone, poly(I:C) (100  $\mu$ g/ml) or LPS (100 ng/ml) in the presence or absence of chloroquine (5  $\mu$ g/ml) or bafilomycin (30 nmol/l) for 24 h. The IL-12p40 concentration in the culture supernatant was assessed by ELISA. Data are expressed as mean  $\pm$  SD of triplicate samples. ND, not detected. All of the experiments were performed more than twice with similar results.

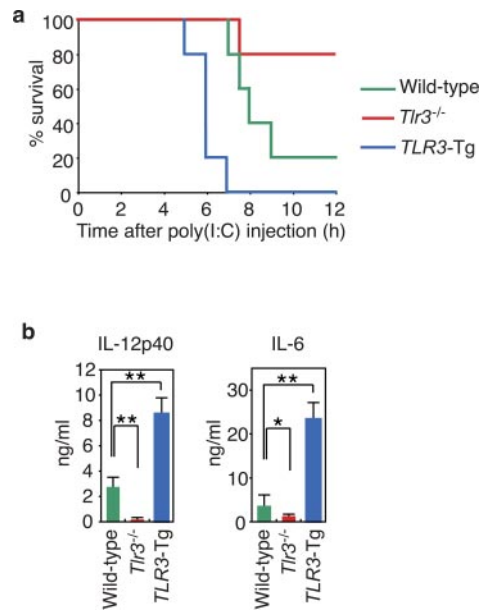

**Fig. S3.** poly(I:C)-mediated lethal shock in *TLR3*-Tg mice. (a) Age-matched wild-type ( $n = 5$ ), *TLR3*-Tg ( $n = 5$ ), and *Tlr3*<sup>-/-</sup> ( $n = 5$ ) mice were injected i.p. with poly(I:C) (10  $\mu$ g) and D-galactosamine (D-GalN; 10 mg). Survival was monitored for 12 h. (b) Sera were collected 3 h after injection, and the concentration of IL-12p40 and IL-6 in the sera was determined by ELISA. Results represent mean  $\pm$  SD of serum samples from five mice. \*\*,  $P < 0.01$ ; \*,  $P < 0.05$ .

**a** Expression profile of genes in *TLR3*-Tg macrophages stimulated with poly(I:C).

| Gene name | Accession No. | Fold increase* | Gene name | Accession No. | Fold increase* |
|-----------|---------------|----------------|-----------|---------------|----------------|
| Il1b      | NM_008361     | 48.6           | Ifnb1     | NM_010510     | 1.7            |
| Il6       | NM_031168     | 43.4           | Ifit1     | NM_008331     | 1.6            |
| Il12b     | NM_008352     | 27.9           | Ifnab     | NM_008336     | 1.6            |
| Il12a     | NM_008351     | 10.2           | Ifna1     | NM_010502     | 1.5            |
| Ptgs2     | NM_011198     | 18.1           | Irf1      | NM_008390     | 1.5            |
| Hbb-bh1   | NM_008219     | 13.1           | Oas1c     | NM_033541     | 1.5            |
| Il1a      | NM_010554     | 12.4           | Ifna4     | NM_010504     | 1.3            |
| Saa1      | NM_009117     | 12.0           | Irf5      | NM_012057     | 1.3            |
| Il19      | NM_001009940  | 11.3           | Ifna9     | NM_010507     | 1.2            |
| Has1      | NM_008215     | 10.2           | Adar      | NM_019655     | 1.2            |
| Cxcl2     | NM_009140     | 10.0           | Ifna5     | NM_010505     | 1.1            |
| Saa3      | NM_011315     | 8.9            |           |               |                |
| Csf3      | NM_009971     | 8.1            |           |               |                |
| Csf2      | NM_009969     | 7.9            |           |               |                |
| Cxcl1     | NM_008176     | 7.6            |           |               |                |
| Il12rb1   | NM_008353     | 5.4            |           |               |                |
| Il17      | NM_010552     | 5.1            |           |               |                |
| Il10      | NM_010548     | 4.6            |           |               |                |
| Ccl7      | NM_013654     | 4.6            |           |               |                |
| Nfkbiz    | NM_030612     | 3.9            |           |               |                |
| Tnf       | NM_013693     | 3.7            |           |               |                |

\*Fold increase over value obtained for wild-type control.

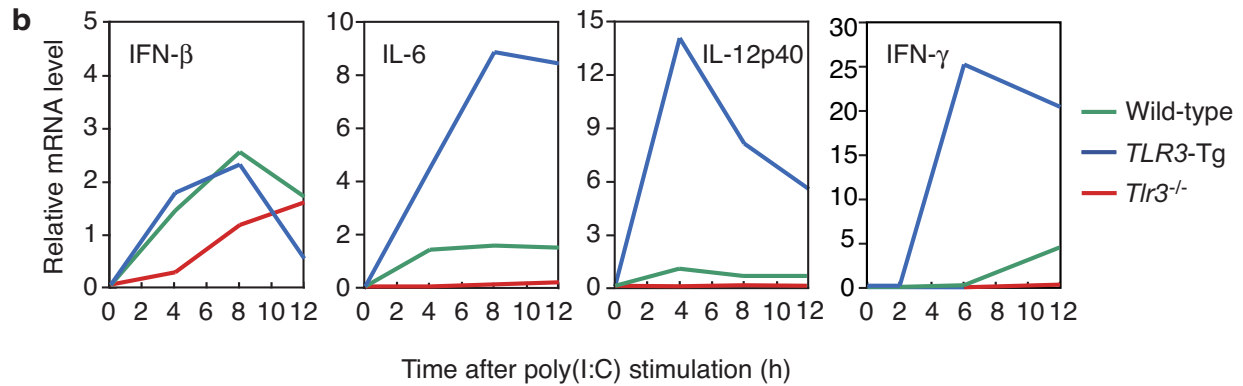

**Fig. 54.** Expression profile of genes in *TLR3*-Tg macrophages stimulated with poly(I:C). (a) Microarray analysis performed on total RNA prepared from wild-type or *TLR3*-Tg PECs stimulated with 100  $\mu$ g/ml poly(I:C) for 6 h. Shown in the left table are data for genes expressed in *TLR3*-Tg cells that showed 3.7-fold or greater change relative to wild-type cells. Data for type I IFN and its inducible genes are shown in the right table. (b) PECs were stimulated with poly(I:C) (100  $\mu$ g/ml) for the indicated periods. Total RNA was prepared and the mRNA expression levels of the indicated genes were determined by real-time RT-PCR. Note that, although microarray analysis showed that the induction of type II IFN mRNA was not dramatically changed between wild-type and *TLR3*-Tg PECs, real-time RT-PCR analysis revealed that type II IFN mRNA was markedly induced in *TLR3*-Tg PECs stimulated with poly(I:C).

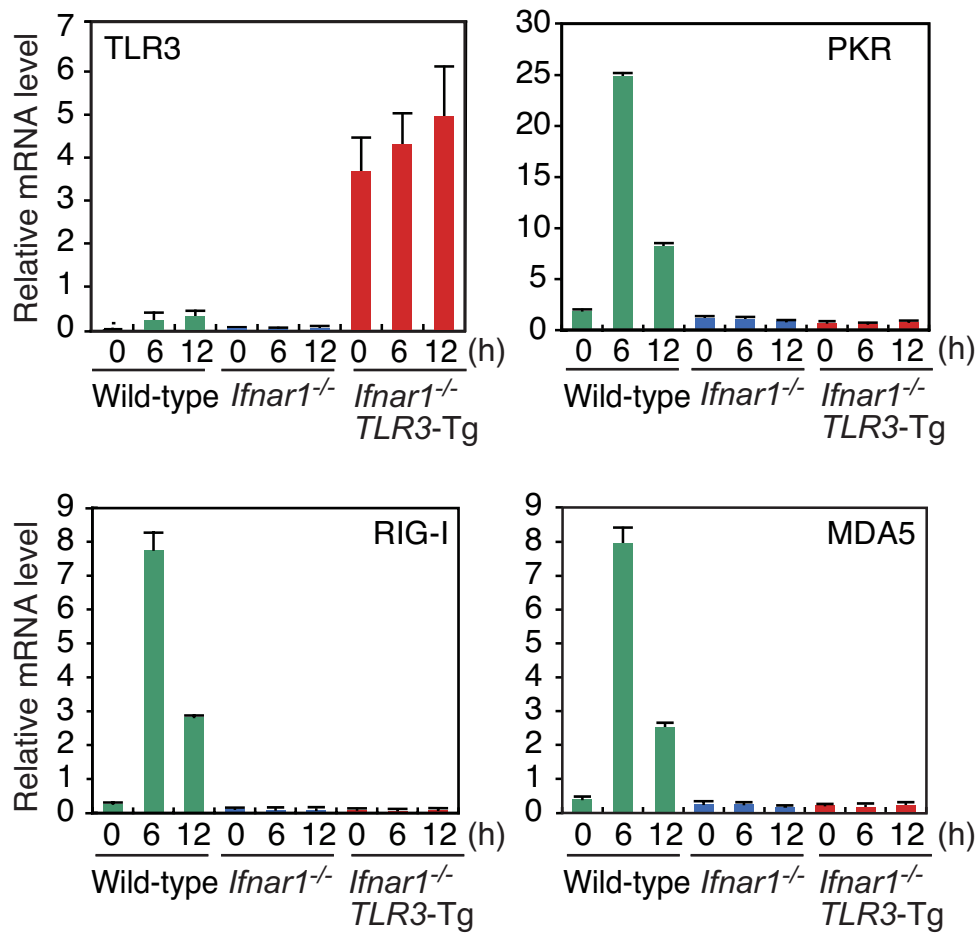

**Fig. S5.** Expression of mRNAs for dsRNA-recognition molecules in *TLR3-Tg Ifnar1*<sup>-/[supi]</sup>- peritoneal macrophage. PECs from wild-type, *Ifnar1*<sup>-/[supi]</sup>- mice, and *TLR3-Tg Ifnar1*<sup>-/[supi]</sup>- mice were stimulated with recombinant IFN- $\beta$  (1000 U/ml) for the indicated periods. Total RNA was prepared and the mRNA expression levels of the indicated genes were determined by real-time RT-PCR. Data are presented as mean  $\pm$  SD of triplicate determinations. The experiment was performed more than twice with similar results.

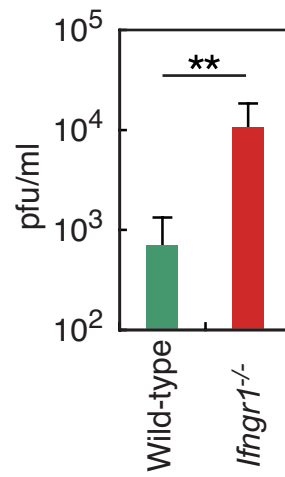

**Fig. S6.** Virus titer in the sera of CVB3 infected *Ifngr1*<sup>-/-</sup> mice. Sera from wild-type ( $n = 5$ ) or *Ifngr1*<sup>-/-</sup> mice ( $n = 5$ ) were collected 2 days after infection, and virus titers were determined by the plaque formation assay. The experiment was performed more than twice with similar results. Results represent mean  $\pm$  SD of serum samples from five mice. \*\*,  $P < 0.01$ .

| a VSV (intranasal infection) |                                                      |          | b VSV (intraperitoneal infection) |                                                    |          |
|------------------------------|------------------------------------------------------|----------|-----------------------------------|----------------------------------------------------|----------|
|                              | virus positive mice/total<br>(virus titer, pfu/lung) | survival |                                   | virus positive mice/total<br>(virus titer, pfu/ml) | survival |
| Wild-type                    | 0/4 (N.D.)                                           | 4/4      | Wild-type                         | 0/4 (N.D.)                                         | 4/4      |
| <i>Tlr3</i> <sup>-/-</sup>   | 1/4 (7.5±15)                                         | 4/4      | <i>Tlr3</i> <sup>-/-</sup>        | 2/4 (16±23)                                        | 4/4      |

  

| c HSV1 (corneal infection) |                                                      |          | d HSV1 (intravenous infection) |                                                    |          |
|----------------------------|------------------------------------------------------|----------|--------------------------------|----------------------------------------------------|----------|
|                            | virus positive mice/total<br>(virus titer, pfu/eyes) | survival |                                | virus positive mice/total<br>(virus titer, pfu/ml) | survival |
| Wild-type                  | 0/4 (N.D.)                                           | 4/4      | Wild-type                      | 0/4 (N.D.)                                         | 4/4      |
| <i>Tlr3</i> <sup>-/-</sup> | 3/4 (14±10)                                          | 4/4      | <i>Tlr3</i> <sup>-/-</sup>     | 0/4 (N.D.)                                         | 4/4      |

**Fig. S7.** Sensitivity of *Tlr3*<sup>-/-</sup> mice to VSV or HSV1 infection. (a) Wild-type ( $n = 4$ ) and *Tlr3*<sup>-/-</sup> mice ( $n = 4$ ) were inoculated intranasally with  $5 \times 10^5$  pfu of VSV. The lungs from each mouse were collected 5 days after infection and homogenized in 1 ml of RPMI culture medium. Virus titers were determined by plaque formation assay. Another set of mice ( $n = 4$  per group), infected by the same method, was monitored for survival over 20 days. (b) Wild-type ( $n = 4$ ) and *Tlr3*<sup>-/-</sup> mice ( $n = 4$ ) were inoculated i.p. with  $5 \times 10^6$  pfu of VSV and monitored for 20 days. Sera from each mouse were collected 2 days after infection and used to determine virus titers by plaque formation assay. (c) Eye corneas of anesthetized wild-type ( $n = 4$ ) and *Tlr3*<sup>-/-</sup> ( $n = 4$ ) mice were scarified five times with a sterile 25-gauge needle and then infected with  $2.5 \mu\text{l}$  of PBS containing  $5 \times 10^5$  PFU of HSV1. Eyes from each mouse were collected 6 days after infection, homogenized in 1 ml RPMI culture medium, and assayed for virus titers by plaque formation assay. Another set of mice ( $n = 4$  per group) was infected by the same method and then monitored for survival over 20 days. (d) Wild-type ( $n = 4$ ) and *Tlr3*<sup>-/-</sup> mice ( $n = 4$ ) were inoculated intravenously with  $5 \times 10^6$  pfu of HSV1 and monitored for 20 days. Sera from each mouse were collected 2 days after infection when sera virus titers were determined by plaque formation assay.
